# Supplementary material
Source: PubMed Central journal article supplement (PMC2980404)
Supplement: lgends.pdf [file lgends.pdf]

**Supp fig. 1. Efficiency of nucleofection and lipofectamine-based transfection is comparable.** Cells were transfected with pEGFP-N1 using either nucleofection or lipofectamine-based transfection. Transfection efficiency was quantitated 4 days after plating and was ~70% in each case. Representative images are shown: green, GFP, blue, DAPI nuclear stain. Scale bar: 10  $\mu$ m

**Supp fig. 2. Localization of endolyn is altered 4, 6 and 8 days post nucleofection.** MDCK cells nucleofected with control or galectin-3 siRNA were plated on filters along with untransfected cells. Cells were processed for indirect immunofluorescence at day 4, 6, 8 or 10 post-transfection to detect surface endolyn. Representative XZ confocal images from untransfected cells and cells treated with control siRNA are shown; endolyn distribution in cells treated with galectin-3 siRNA was indistinguishable from control siRNA samples. Galectin-3 knockdown efficiency was assessed by western blotting of parallel filters and ranged between 87-93% (89% at 10 days). Similar results were obtained in two independent experiments. Bar, 10  $\mu$ m.
