# Supplementary material
Source: PubMed Central journal article supplement (PMC2980404)

**Mo et al.  
Supplemental Fig.1**

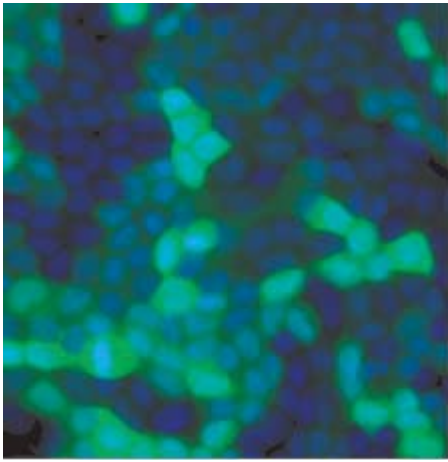

**nucleofection**

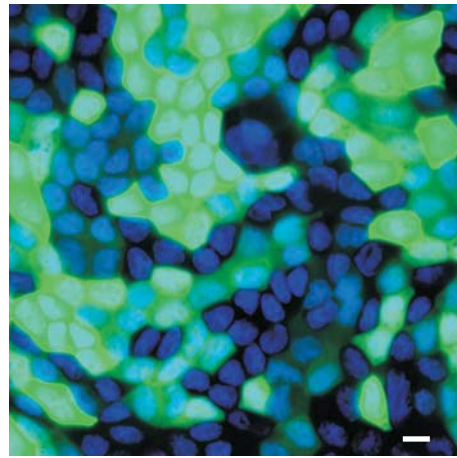

**lipofectamine**

Supplement: figS1.pdf [file figS1.pdf]

# Mo et al. Supplemental Fig.2

endolyn

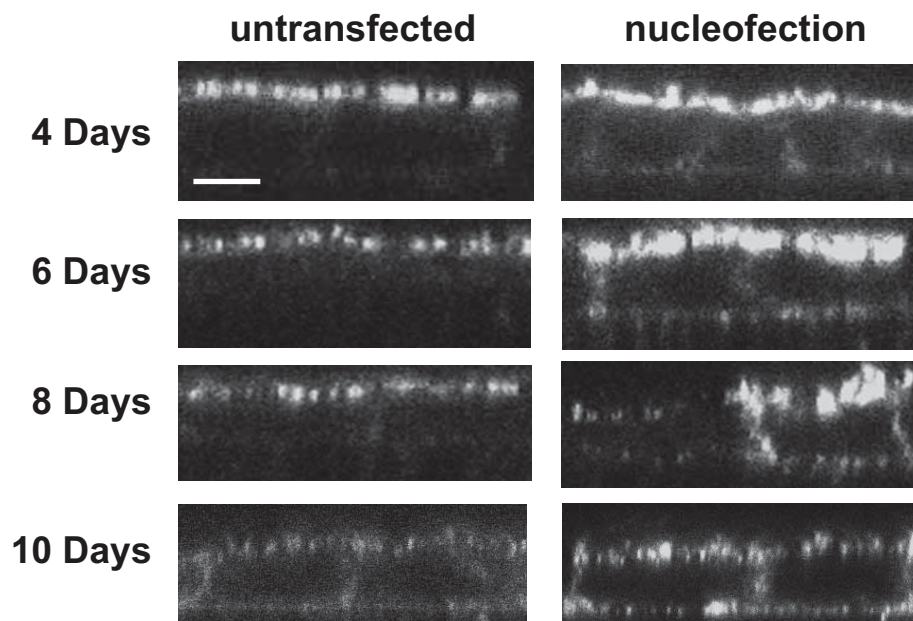

Supplement: figS2.pdf [file figS2.pdf]
